# Supplementary material for: Structural and electrochemical characterization of carbon supported Pt–Pr catalysts for direct ethanol fuel cells prepared using a modified formic acid method in a CO atmosphere
Source: Royal Society of Chemistry journal article supplement (doi:10.1039/c3cp51183a), 2013-01-01

## SUPPORTING INFORMATION

The first and third cycle of CO stripping voltammetry for Pt-Pr/C catalysts.

Figure SII. First and third cycle of CO stripping profiles for Pt-Pr/C catalysts prepared in CO atmosphere for different Pt:Pr compositions at fixed MPAT, and for Pt-Pr/C (1:1) at various MPATs.

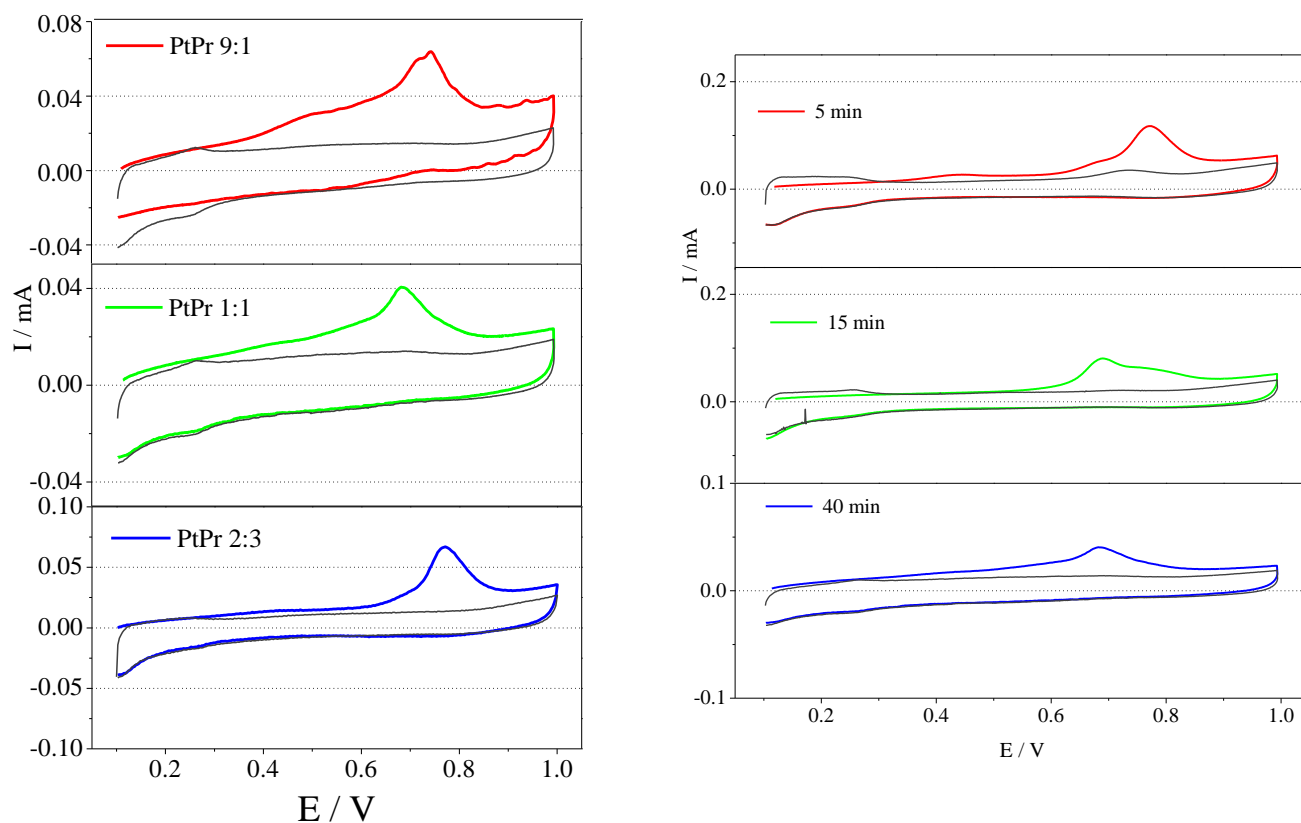

Supplement: c3cp51183a.pdf [file c3cp51183a.pdf]
